# Supplementary material for: Regulated Iron Siderophore Production of the Halophilic Archaeon Haloferax volcanii
Source: MDPI journal article supplement (doi:10.3390/biom10071072), 2020-07-17
Supplement: s1 [file s1]

## Supplementary Tables

### Supplementary Table S1. List of primers

#### Name Sequence

|                 |                                             |
|-----------------|---------------------------------------------|
| HVO_B0041-44 P1 | CCCCGTGCGCGACGACGACG                        |
| HVO_B0041-44 P2 | TCAGTCGTCCGCCGTGTCGTTCGGATTCATGCGTGTCCGGTCG |
| HVO_B0041-44 P3 | ATGAATCCGAACGACACGGCGGACGACTGACCCGCTGAG     |
| HVO_B0041-44 P4 | CGGTGGACTGGCCGGCCGC                         |
| B0044 S1 rev    | AGCCACAGCACCGACA                            |
| B0044 S1 for    | GCACCTCGGCCGAATA                            |

**Supplementary Table S2. Selected features of the proteins HVO\_B0041 – HVO\_B0046.**

| Protein name | Dat                                   | Bdb                                               | IucA                        | IucB                                | IucD                       | IucC              |
|--------------|---------------------------------------|---------------------------------------------------|-----------------------------|-------------------------------------|----------------------------|-------------------|
| H. volcanii  | HVO_B0046                             | HVO_B0045                                         | HVO_B0044                   | HVO_B0043                           | HVO_B0042                  | HVO_B0041         |
| UniProt ID   | D4GP48                                | D4GP47                                            | D4GP46                      | D4GP45                              | D4GP44                     | D4GP43            |
|              |                                       |                                                   |                             |                                     |                            |                   |
| No. aa       | 459                                   | 521                                               | 593                         | 213                                 | 457                        | 612               |
| mw           | 49.13                                 | 56,11                                             | 65.68                       | 23.92                               | 52.01                      | 70.10             |
| pI           | 4.6                                   | 4.4                                               | 4.5                         | 4.9                                 | 4.5                        | 4.6               |
| Transmembr.  | No                                    | No                                                | no                          | No                                  | No                         | No                |
| Signal pept. | No                                    | No                                                | no                          | No                                  | No                         | No                |
| RR..LAGC     | No                                    | No                                                | no                          | No                                  | No                         | No                |
|              |                                       |                                                   |                             |                                     |                            |                   |
| domain       | 11-452                                | 78-433                                            | 6-344                       | 34-197                              | 145-393                    | 6-344             |
| domain       | IPR004637                             | IPR002129                                         | IPRO025700                  | IPR000182                           | IPR007310                  | IPR025700         |
| domain       | 2,4-diaminobutyrate<br>4-transaminase | Pyridoxalphosphate-<br>dependend<br>decarboxylase | L-lysine-6-<br>monoxygenase | Acetyl-transferase<br>(GNAT domain) | Aerobactin<br>biosynthesis | Lys/Orn-oxygenase |
| Remark       |                                       |                                                   |                             |                                     |                            |                   |

**Supplementary Table S3.** Comparison of the amino acid compositions of the four Iuc proteins with that of the proteome of *H. volcanii*. Considerable differences between the compositions of the three proteins and the average proteome are marked in blue (much lower fraction) and in red (much higher fraction) and are shown in bold.

| Amino acid | <i>H. volcanii</i> Proteome | Dat          | Bdb          | IucA         | IucB         | IucD         | IucC         |
|------------|-----------------------------|--------------|--------------|--------------|--------------|--------------|--------------|
|            | HVO_                        | B0046        | B0045        | B0044        | B0043        | B0042        | B0041        |
|            | Fraction [%]                | Fraction [%] | Fraction [%] | Fraction [%] | Fraction [%] | Fraction [%] | Fraction [%] |
| A          | 11.0                        | 12,2         | 13,4         | 8.1          | 13.6         | 7.9          | <b>6.2</b>   |
| C          | 0.7                         | 1,3          | <b>1,5</b>   | 0.8          | <b>1.4</b>   | 0.7          | <b>0.3</b>   |
| D          | 8.4                         | 9,2          | 12,5         | 8.1          | 10.3         | 9.8          | 10.8         |
| E          | 8.0                         | 8,5          | 6,0          | 9.1          | 7.5          | 9.4          | 9.0          |
| F          | 3.5                         | 2,4          | 3,1          | 3.7          | 3.3          | 5.0          | 4.6          |
| G          | 8.5                         | 10,0         | 7,5          | 6.9          | 5.2          | 7.4          | 7.4          |
| H          | 2.0                         | 3,7          | 2,1          | 2.2          | <b>4.2</b>   | 3.1          | 3.6          |
| I          | 3.8                         | 2,8          | 2,3          | <b>1.7</b>   | 2.8          | 2.4          | 2.8          |
| K          | 2.0                         | <b>1,1</b>   | 1,7          | <b>1.2</b>   | 2.3          | <b>1.1</b>   | 2.5          |
| L          | 9.1                         | 9,2          | 10,6         | 11.6         | 8.5          | 9.0          | 10.9         |
| M          | 1.8                         | 2,4          | 1,3          | <b>0.7</b>   | 1.9          | <b>0.9</b>   | 1.1          |
| N          | 2.4                         | 1,5          | 2,5          | 3.4          | 1.4          | 2.4          | 2.0          |
| P          | 4.6                         | 6,1          | 5,4          | 6.7          | 6.6          | 6.1          | 5.6          |
| Q          | 2.4                         | 1,5          | 1,9          | 2.9          | 1.4          | 3.1          | 2.3          |

|        |           |            |     |            |            |            |            |
|--------|-----------|------------|-----|------------|------------|------------|------------|
| R      | 6.7       | 7,2        | 7,7 | 7.1        | 8.5        | 8.1        | 7.7        |
| S      | 5.9       | 3,9        | 4,6 | 6.1        | <b>1.9</b> | 3.5        | 4.4        |
| T      | 6.2       | 5,2        | 5,6 | 5.6        | 6.6        | 5.3        | 5.4        |
| V      | 9.2       | 8,9        | 7,7 | 9.3        | 7.0        | 8.5        | 7.2        |
| W      | 1.1       | <b>0,4</b> | 0,8 | 0.7        | 1.4        | 1.5        | 1.8        |
| Y      | 2.7       | 2,4        | 1,9 | <b>4.2</b> | <b>4.2</b> | <b>4.8</b> | <b>4.6</b> |
| No. aa | 1.168.832 | 459        | 521 | 593        | 213        | 457        | 612        |

**Supplementary Table S4.** Results of BLAST searches with the protein sequences of HVO\_B0041 – HVO\_B0046 in the UniProt taxonomic groups “Bacteria” and “Archaea”, respectively. The 1000 best results were listed. The Table gives an overview of the number of species with homologs, the phylogenetic groups of these species, and the annotations of the homologs.

If 1000 homologs were retrieved, the p-value of Nr. 1000 is listed in parenthesis.

“Bacillus genera” summarizes many genera with Bacillus in their name, e.g. Paenibacillus, Halobacillus, Fictibacillus, Brevibacillus etc.

| Protein   | Archaea                                      |                                                     |                                                                                                                | Bacteria                            |                                                                                      |                                                                                                                |
|-----------|----------------------------------------------|-----------------------------------------------------|----------------------------------------------------------------------------------------------------------------|-------------------------------------|--------------------------------------------------------------------------------------|----------------------------------------------------------------------------------------------------------------|
|           | No. species with homologs (p-value)          | Phylogenetic groups                                 | Annotations                                                                                                    | No. species With Homologs (p-value) | Phylogenetic groups                                                                  | Annotations                                                                                                    |
| HVO_B0046 | >1000<br>(2.6 E-57)                          | Haloarchaea<br>Methanogenic A.<br>div. other groups | Diaminobutyrate<br>pyruvate aminotransf.<br>Diaminobutyrate<br>Oxoglutarate aminotr.<br>Aspartate aminotransf. | >1000<br>(0.0)                      | Bacillus genera<br>e.g. Paenib. etc.<br>Pseudomonas<br>Cyanobacteria<br>Streptomyces | Diaminobutyrate<br>Pyruvate aminotransf.<br>Diaminobutyrate<br>Oxoglutarate aminotr.<br>Aspartate aminotransf. |
| HVO_B0045 | >1000<br>(5.0 E-10)<br>Including<br>paralogs | Haloarchaea<br>Methanogenic A.<br>div. other groups | 2,4-Diaminobutyrate<br>decarboxylase<br>Glutamate decarboxylase<br>Aspartate decarboxylase                     | >1000<br>(5.6 E-111)                | Bacillus genera<br>Enterobacteriaceae                                                | 2,4-Diaminobutyrate<br>decarboxylase<br>Aspartate aminotransferase<br>family                                   |

|           | No. species with homologs (p-value) | Phylogenetic groups | Annotations                                                                        | No. species With Homologs (p-value) | Phylogenetic groups                              | Annotations                                                                                                                           |
|-----------|-------------------------------------|---------------------|------------------------------------------------------------------------------------|-------------------------------------|--------------------------------------------------|---------------------------------------------------------------------------------------------------------------------------------------|
| HVO_B0044 | About 200                           | Only Haloarchaea    | Iron transport protein<br>Siderophore biosynthesis pr.<br>IucA/IucC family protein | >1000<br>(2.5 E-118)                | Bacillus genera<br>Streptomyces<br>Cyanobacteria | Iron transport protein<br>Petrobactin biosynthesis pr.<br>IucA/IucC family protein                                                    |
| HVO_B0043 | 87                                  | Only Haloarchaea    | Iron transport protein<br>Siderophore biosynthesis pr.                             | >1000<br>(1.3 E-22)                 | Bacillus genera<br>Streptomyces<br>Cyanobacteria | Acetyltransferase<br>Lysine acetyltransferase<br>Hydrocylisine acetyltr.<br>Rhizobactin biosynthesis pr.                              |
| HVO_B0042 | 85                                  | Only Haloarchaea    | Lysine monooxygenase<br>Monooxygenase                                              | >1000<br>(1.4 E-116)                | Bacillus genera<br>Streptomyces<br>Cyanobacteria | Lysine monooxygenase<br>Siderophore biosynthesis p.<br>Rhizobactin biosynthesis p.<br>Alcaligin biosynthesis p.<br>Lysine hydroxylase |
| HVO_B0041 | About 200                           | Only Haloarchaea    | Iron transport protein<br>IucA/IucC family protein                                 | >1000<br>(5.0 E-116)                | Bacillus genera<br>Streptomyces<br>Cyanobacteria | Iron transport protein<br>IucA/IucC family protein<br>Aerobactin synthase                                                             |
